# Supplementary material
Source: publisher figshare collection journal article supplement (https://frontiersin.figshare.com/ndownloader/files/25975697)
Supplement: Supplementary file 1 [file 25975697]

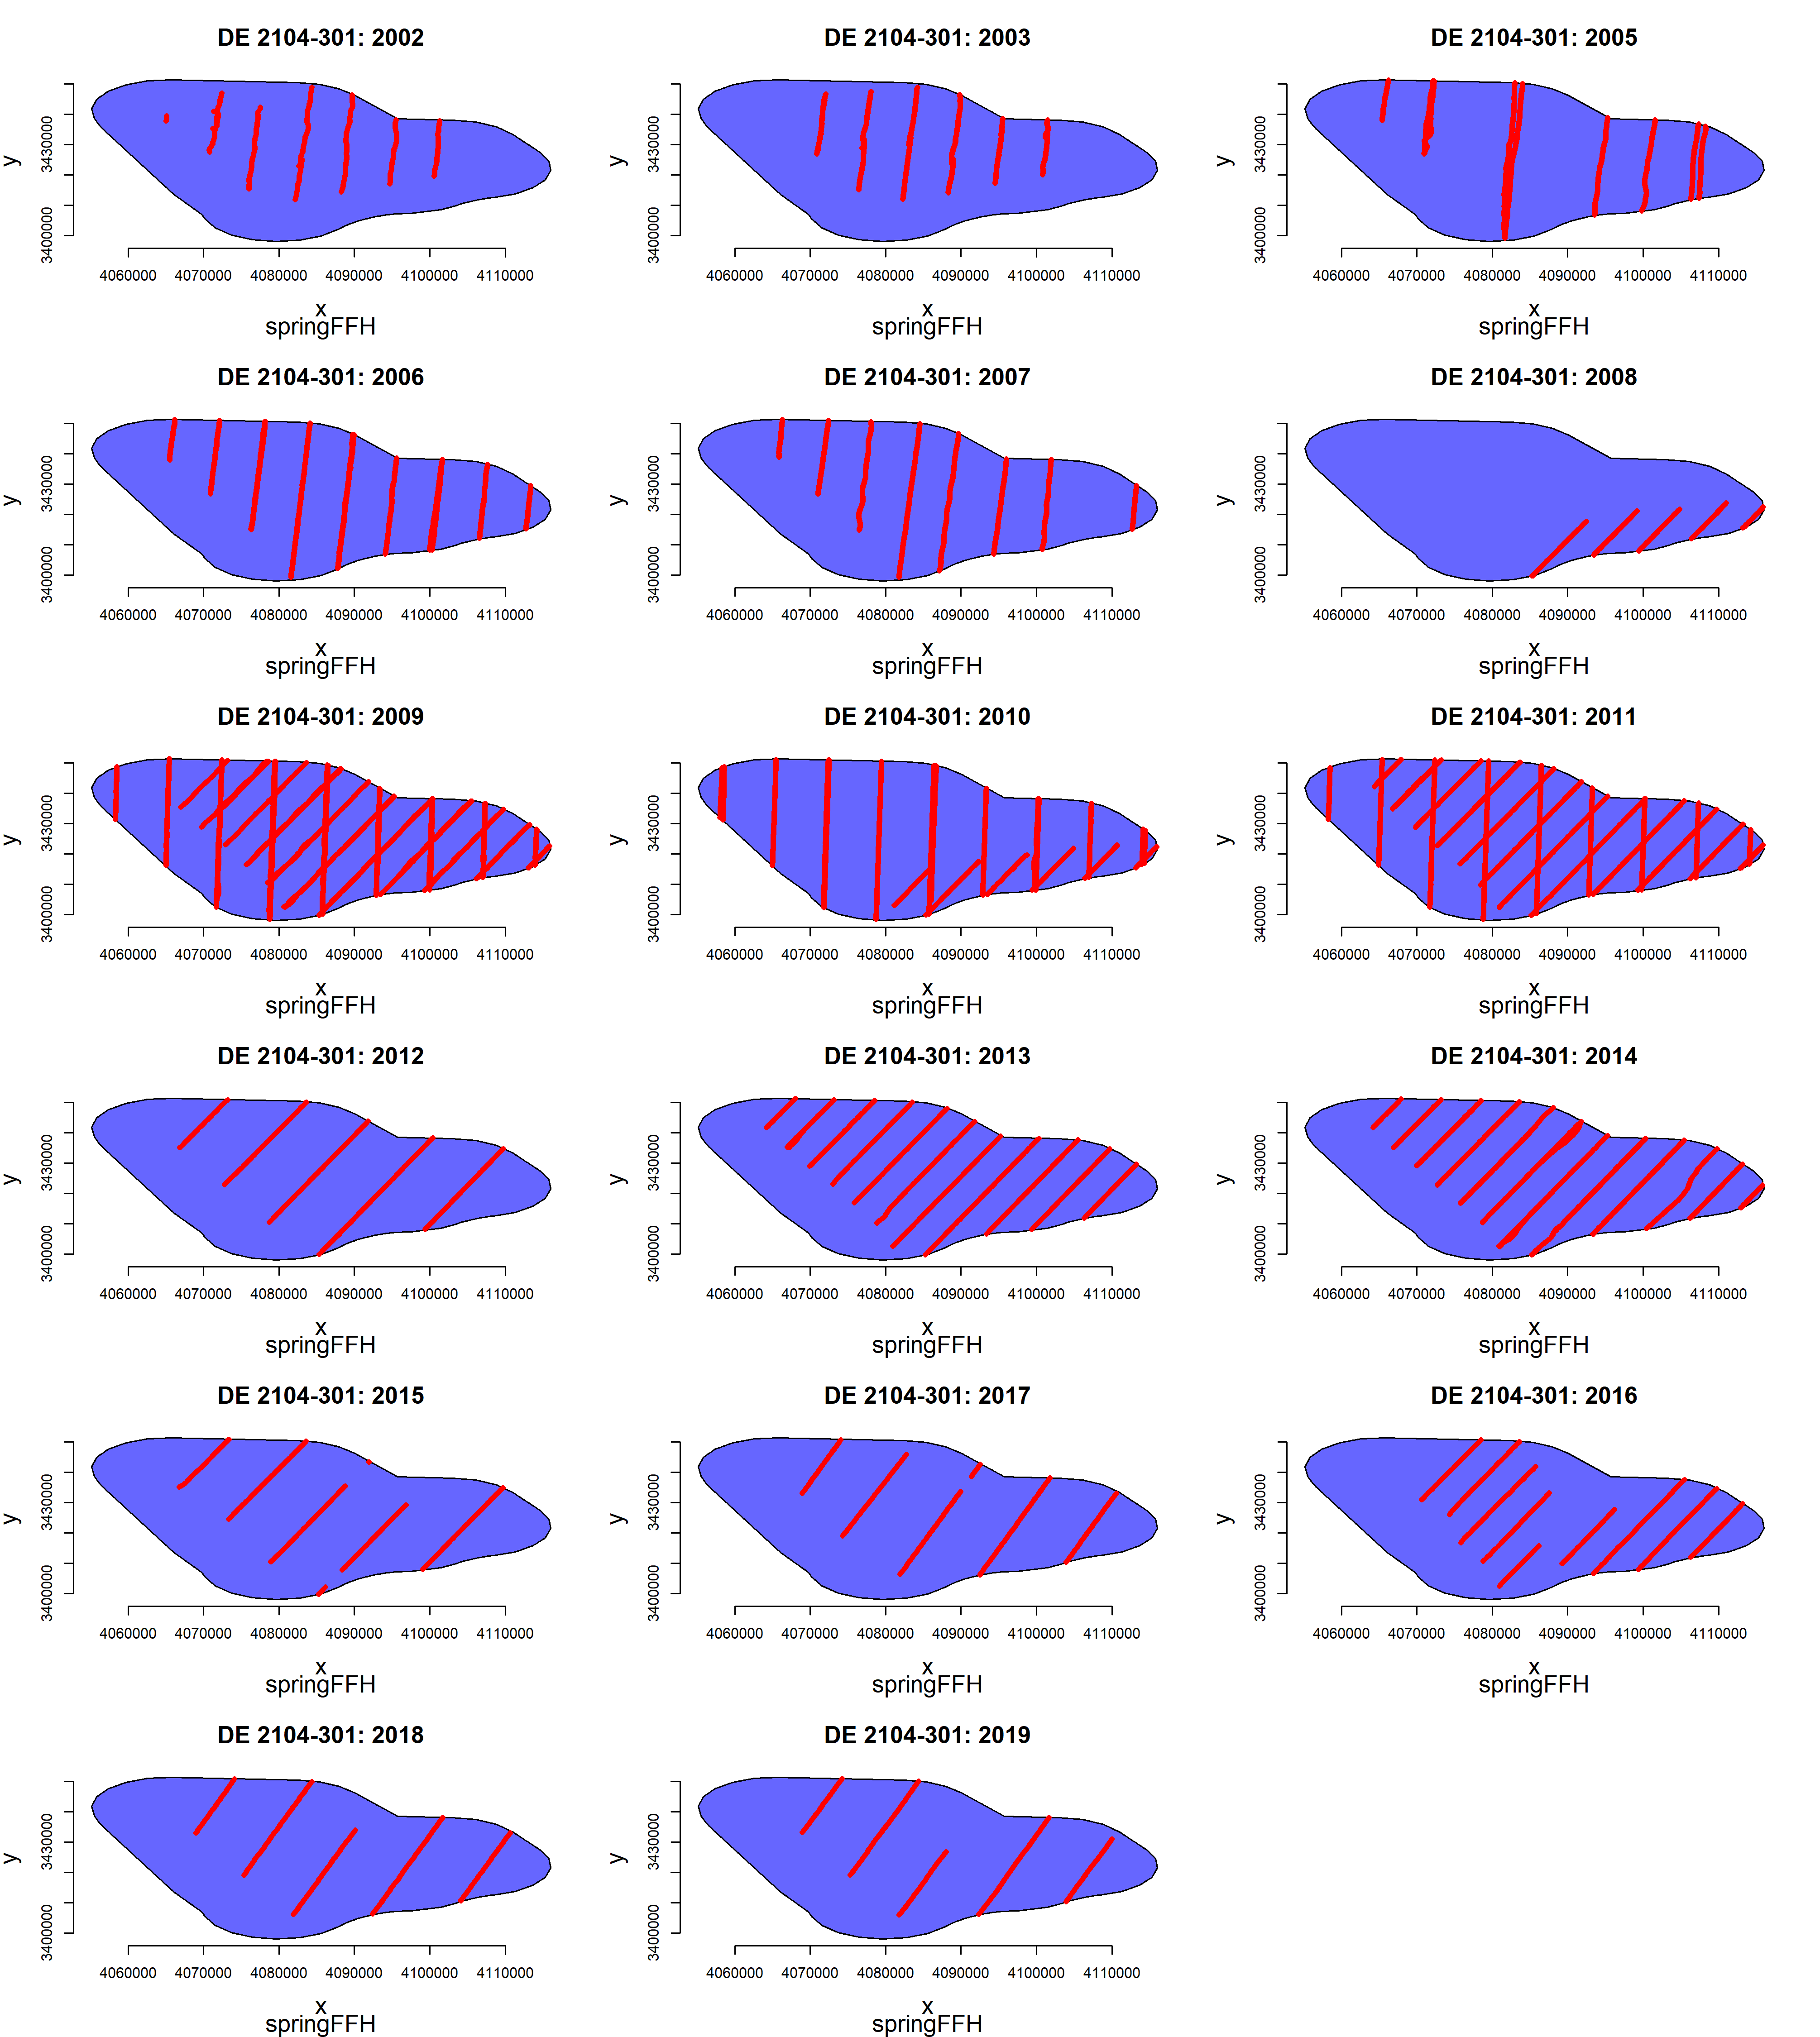


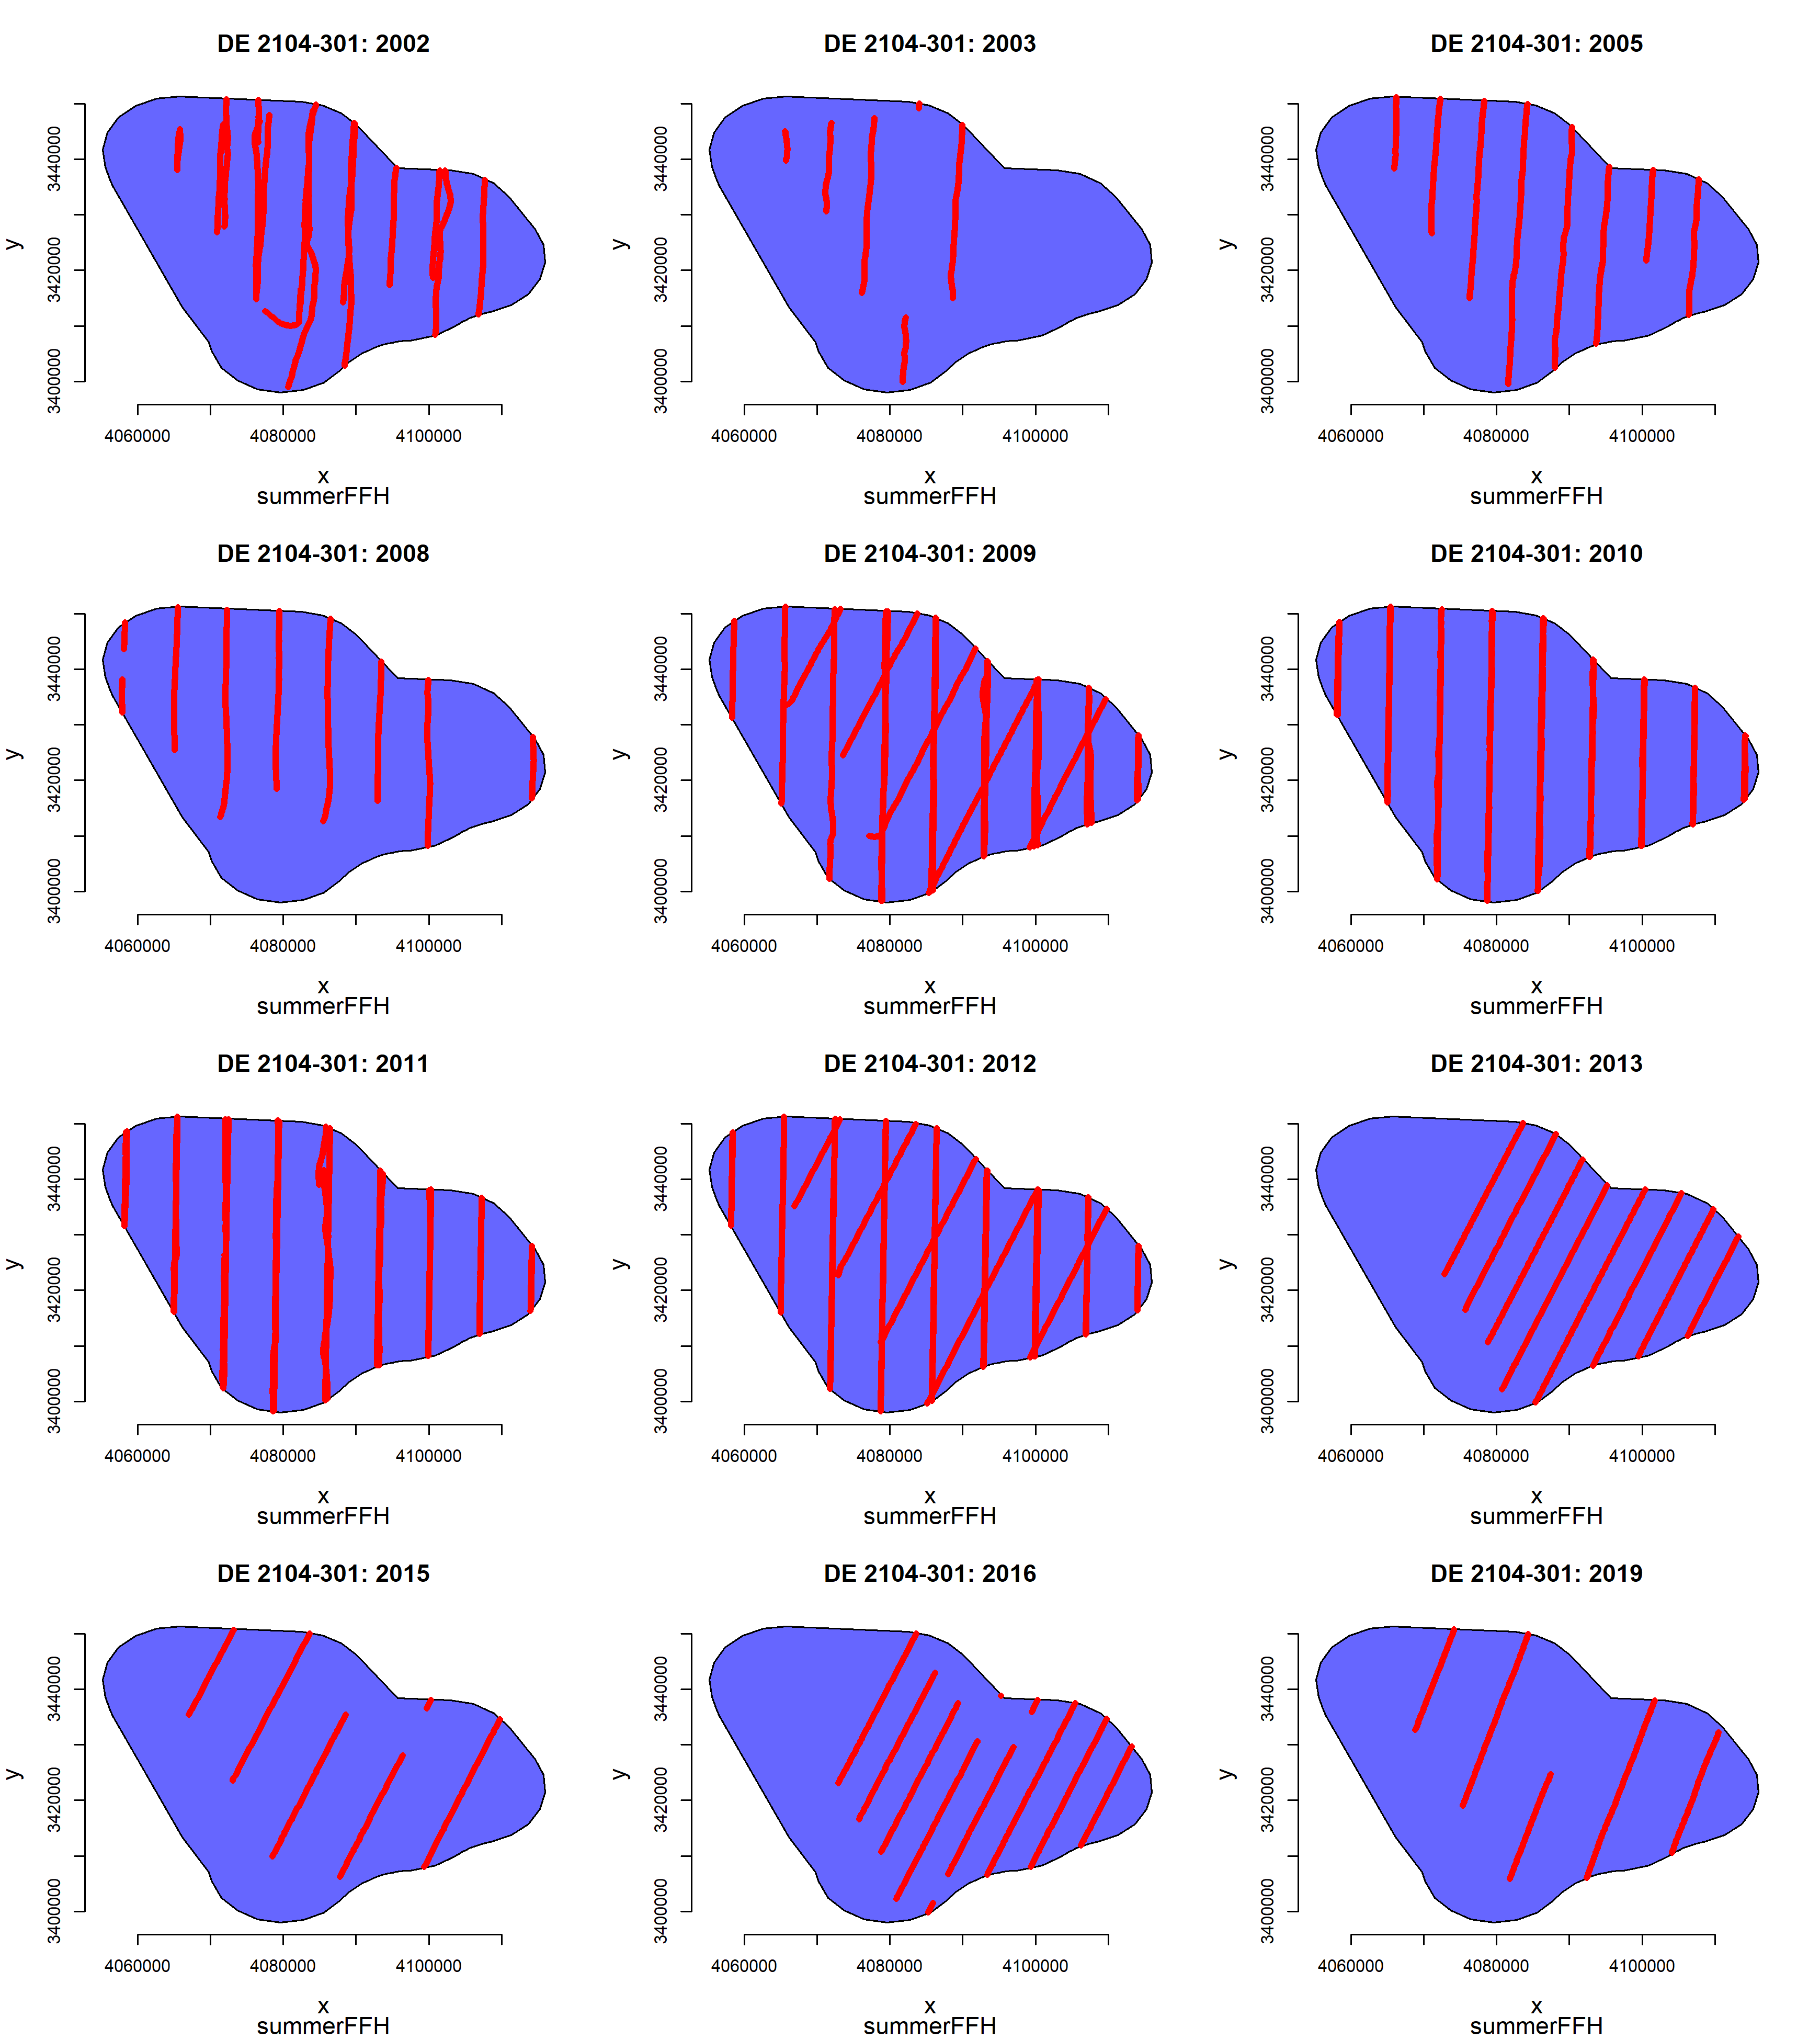


**Supplementary Figure 4.** Survey effort and coverage for trend analysis of the SAC Borkum Reef Ground (DE 2104-301). Maps show the stratum (blue) and the post-stratified transects within the area (red). The upper figure illustrates the coverage in spring, the lower figure the coverage in summer.
